# Supplementary material
Source: publisher site journal article supplement (https://www.dovepress.com/article/352238)
Supplement: Supplementary file 1 [file get_supplementary_file.php]

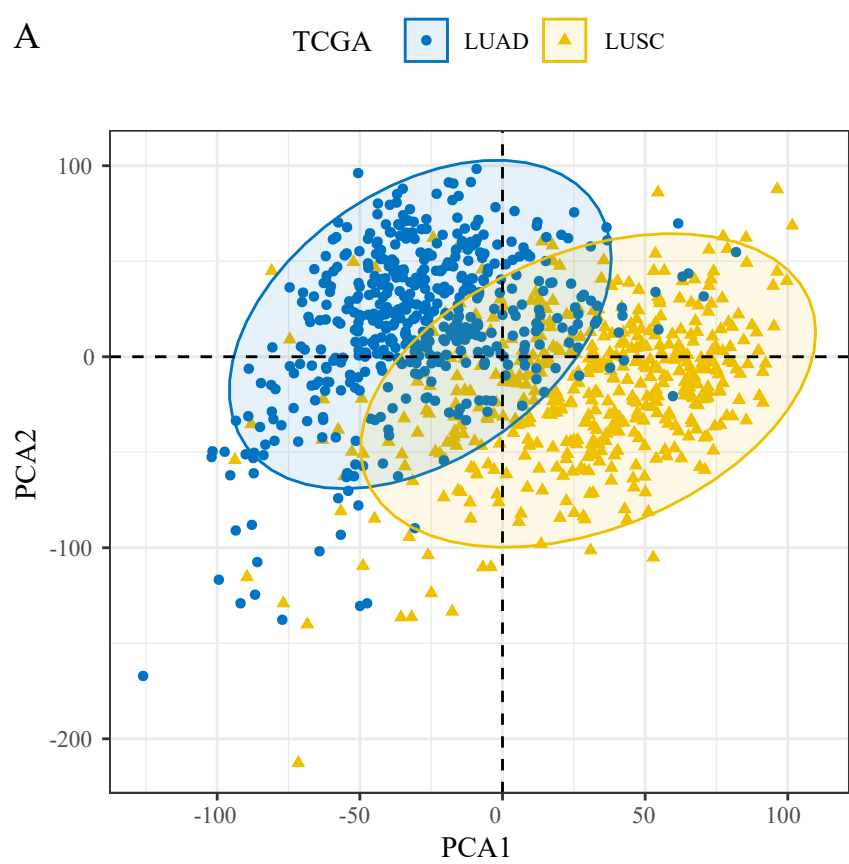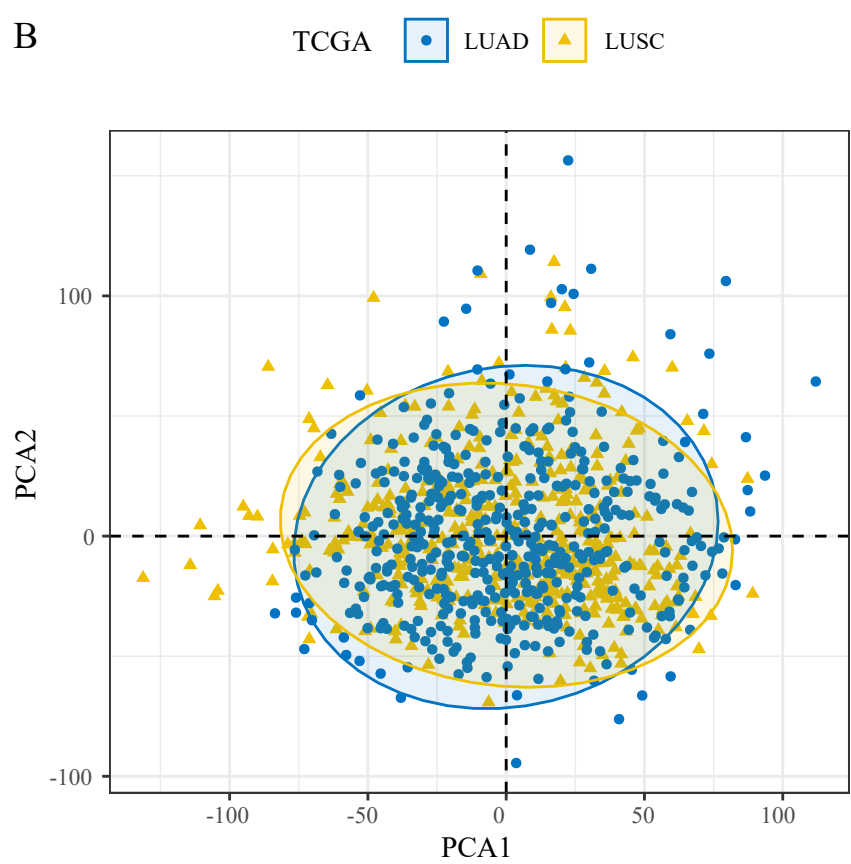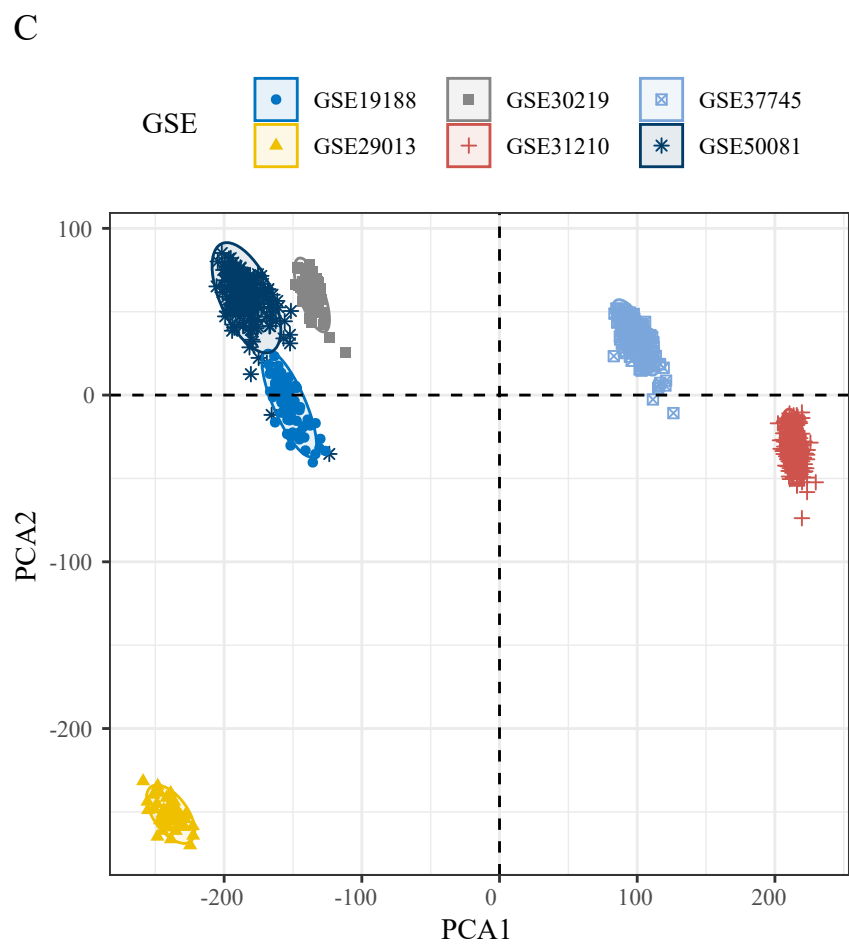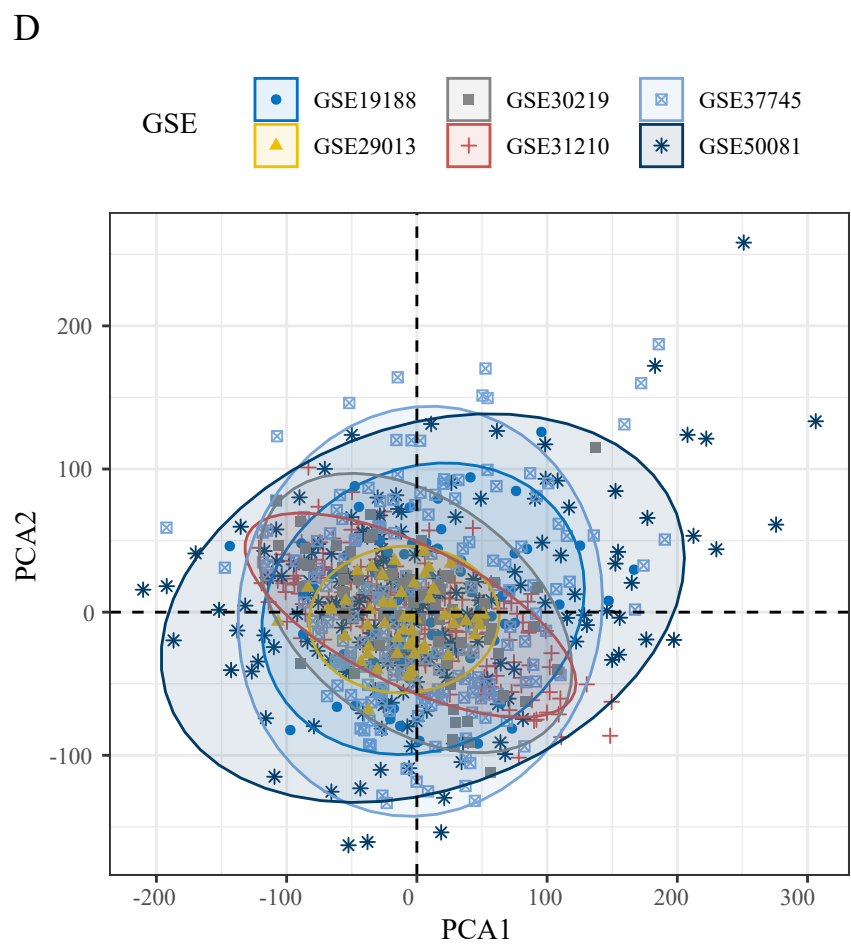

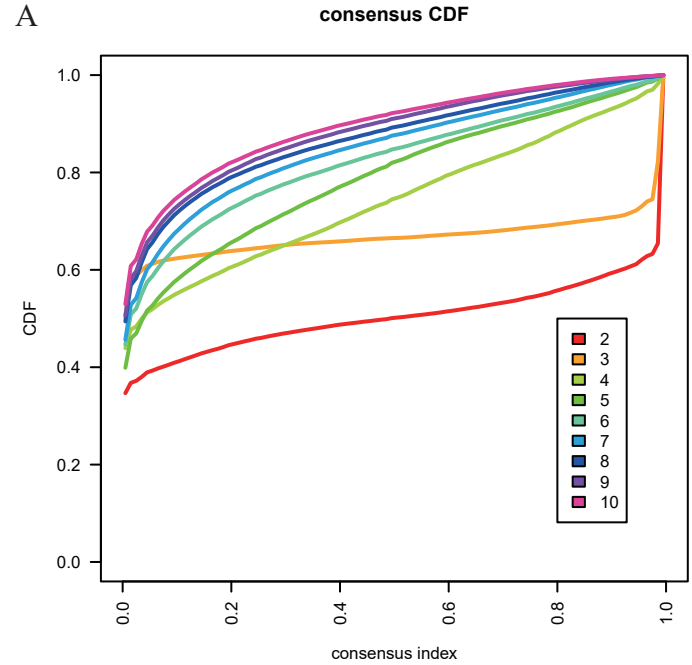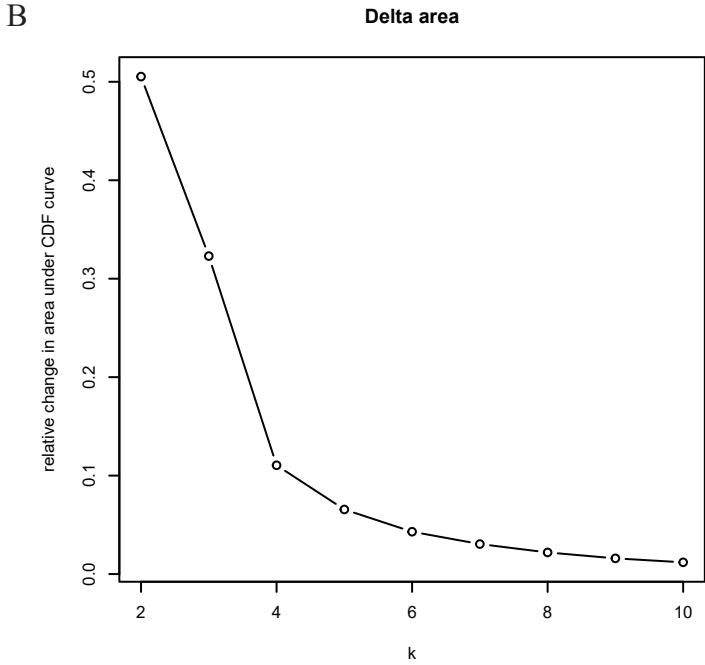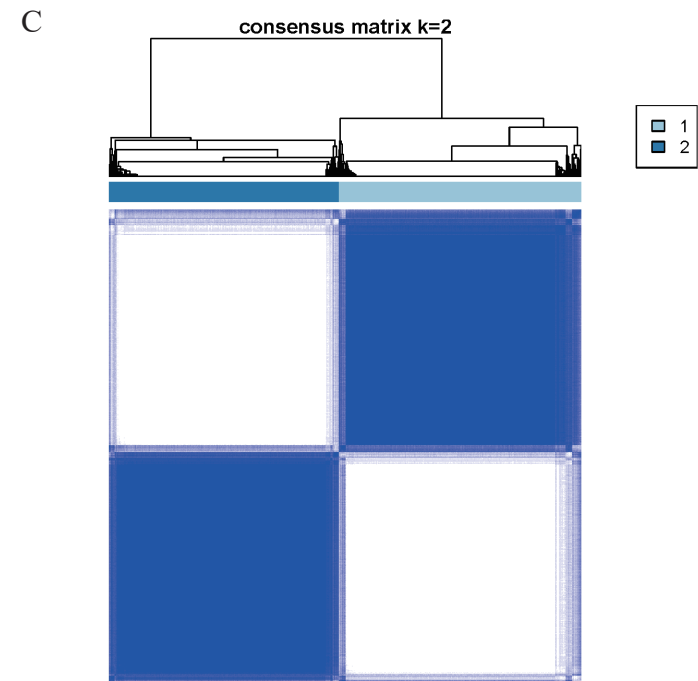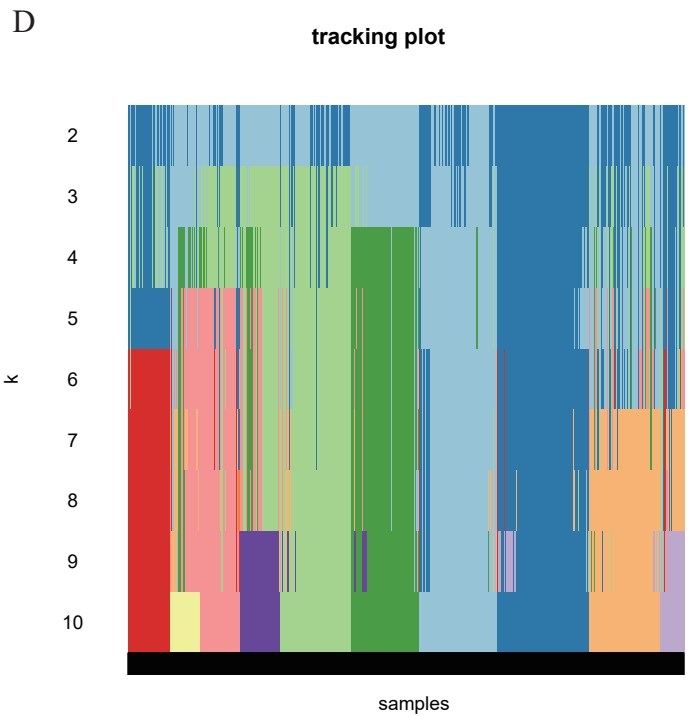

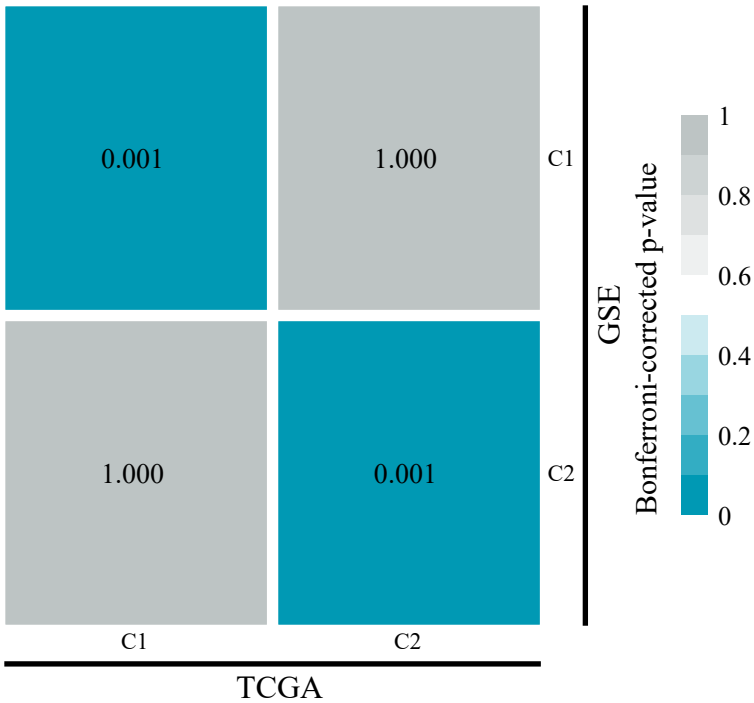

A

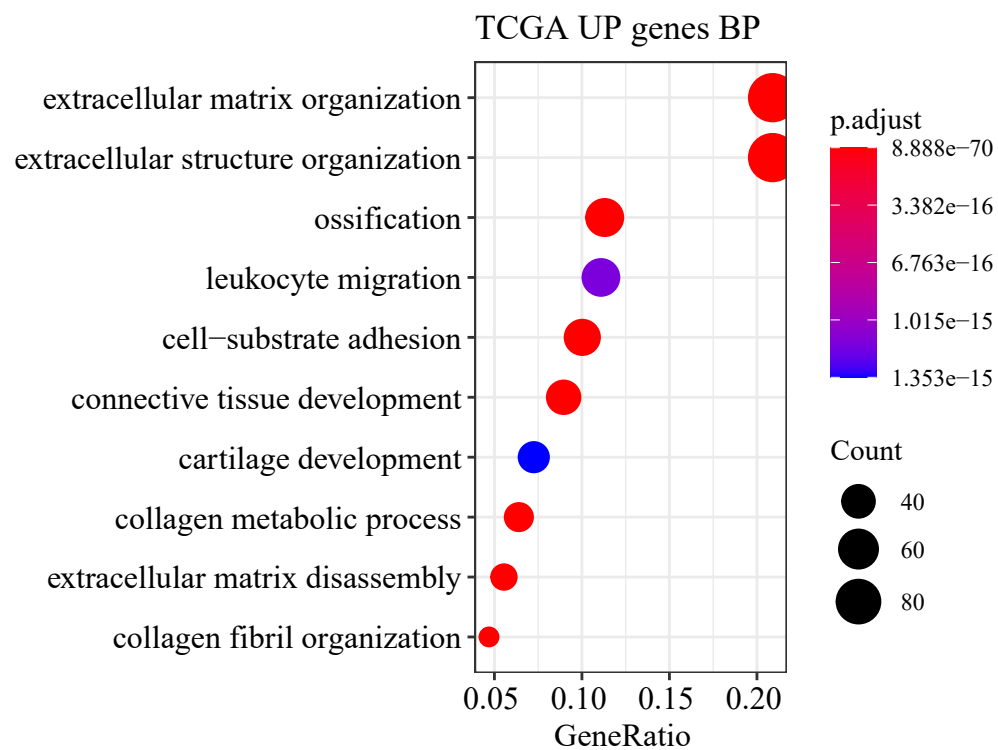

B

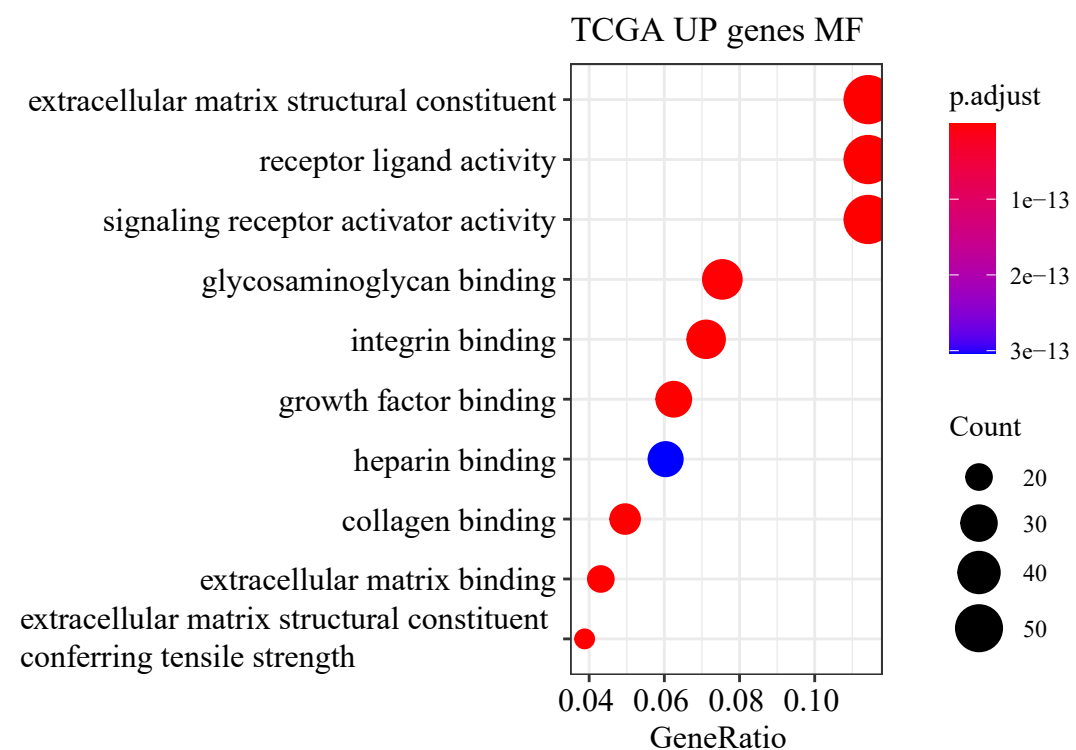

C

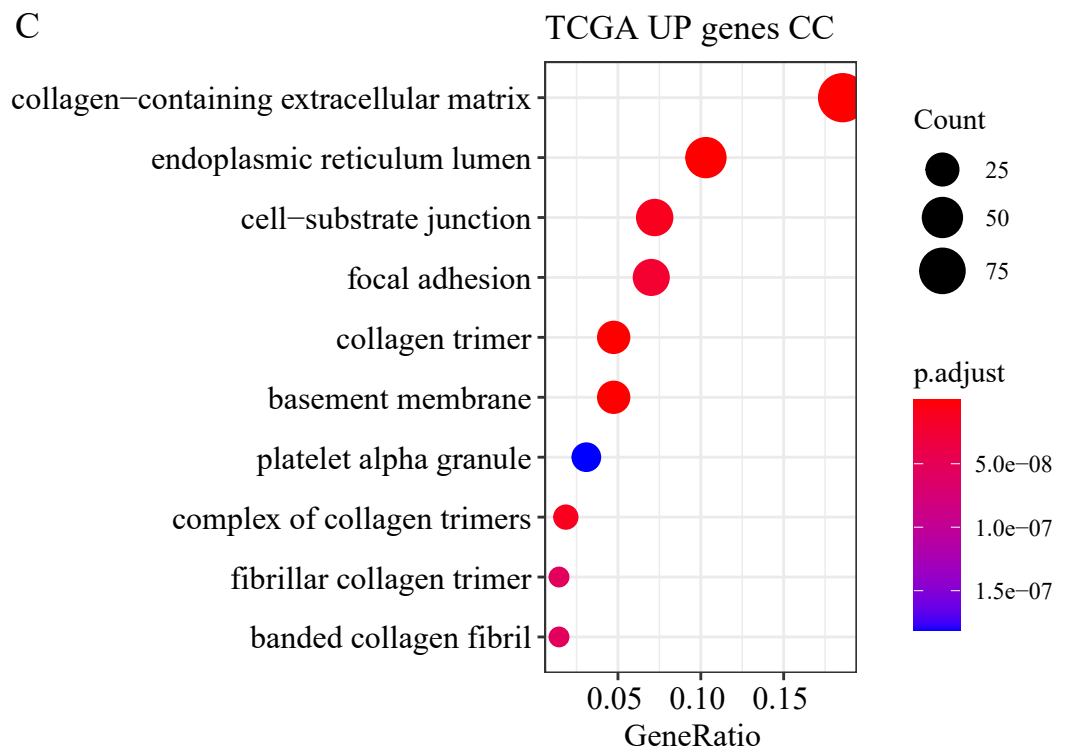

D

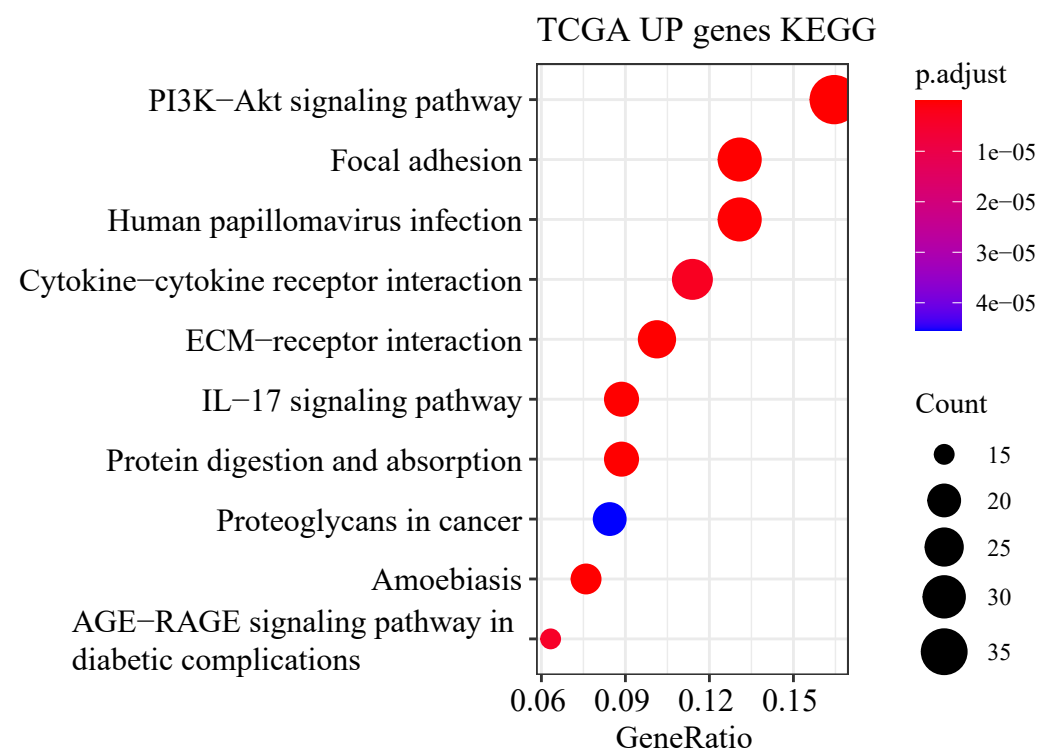

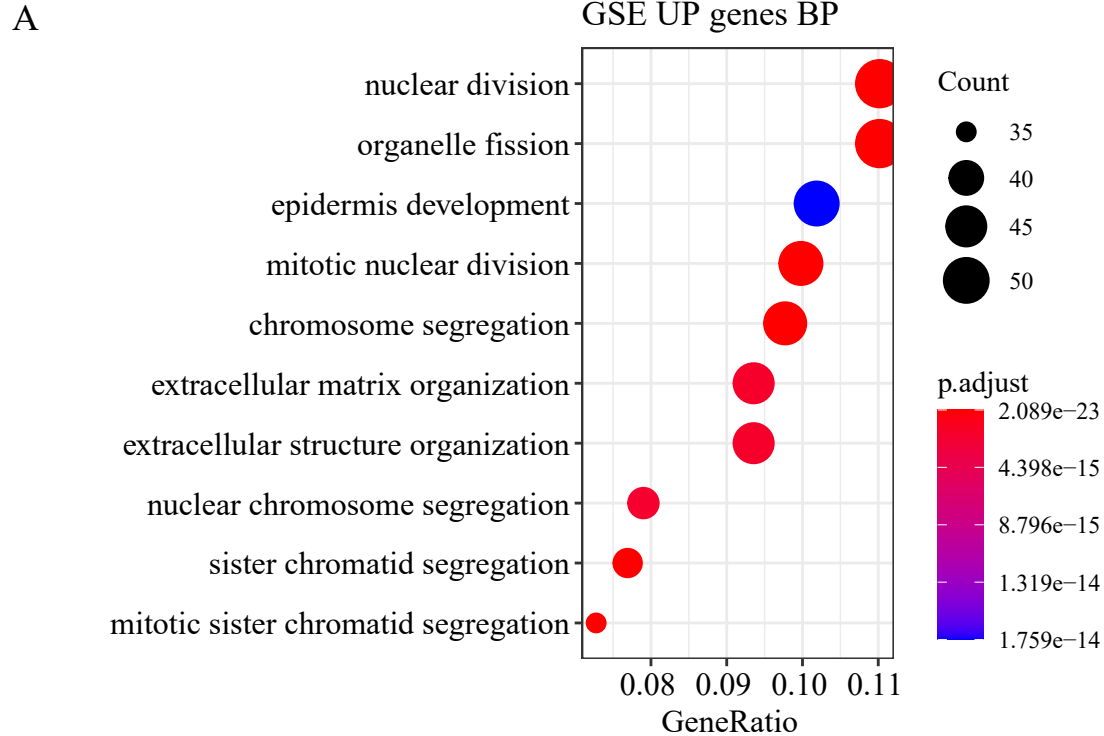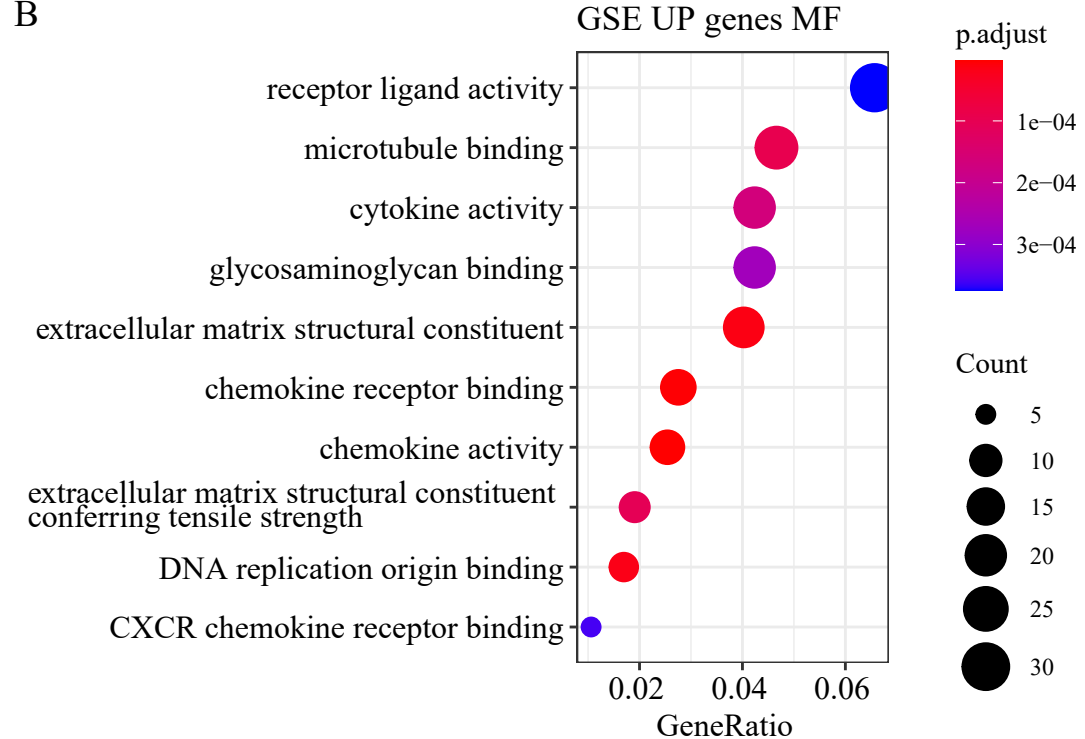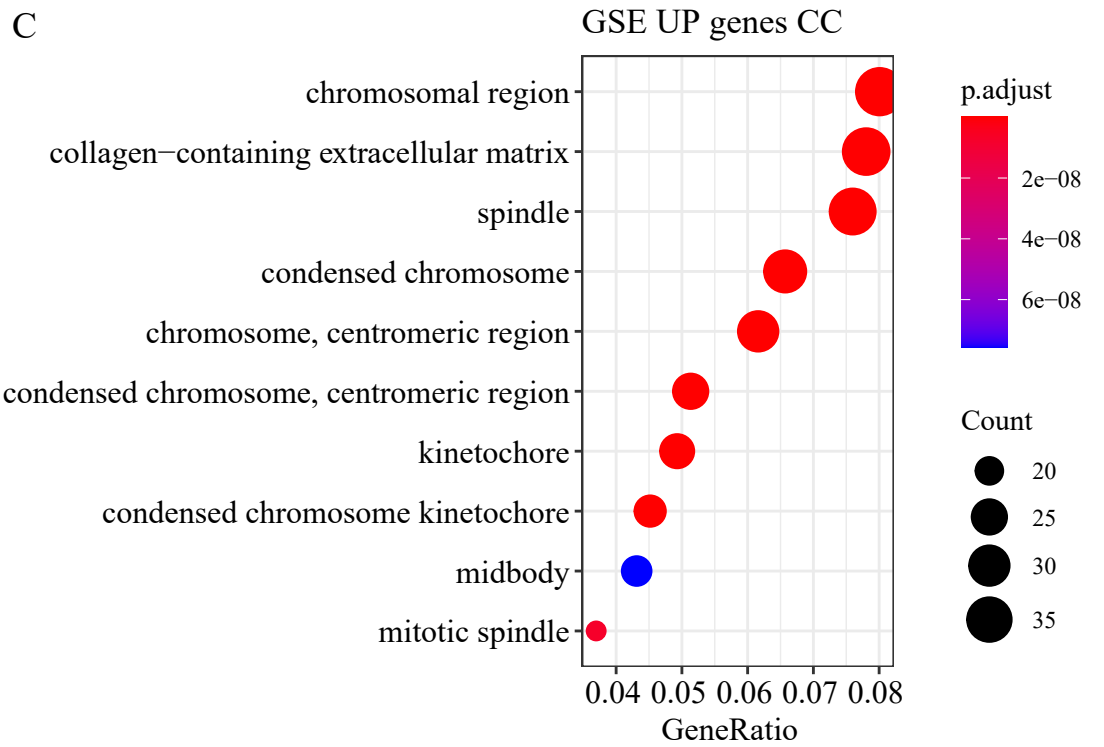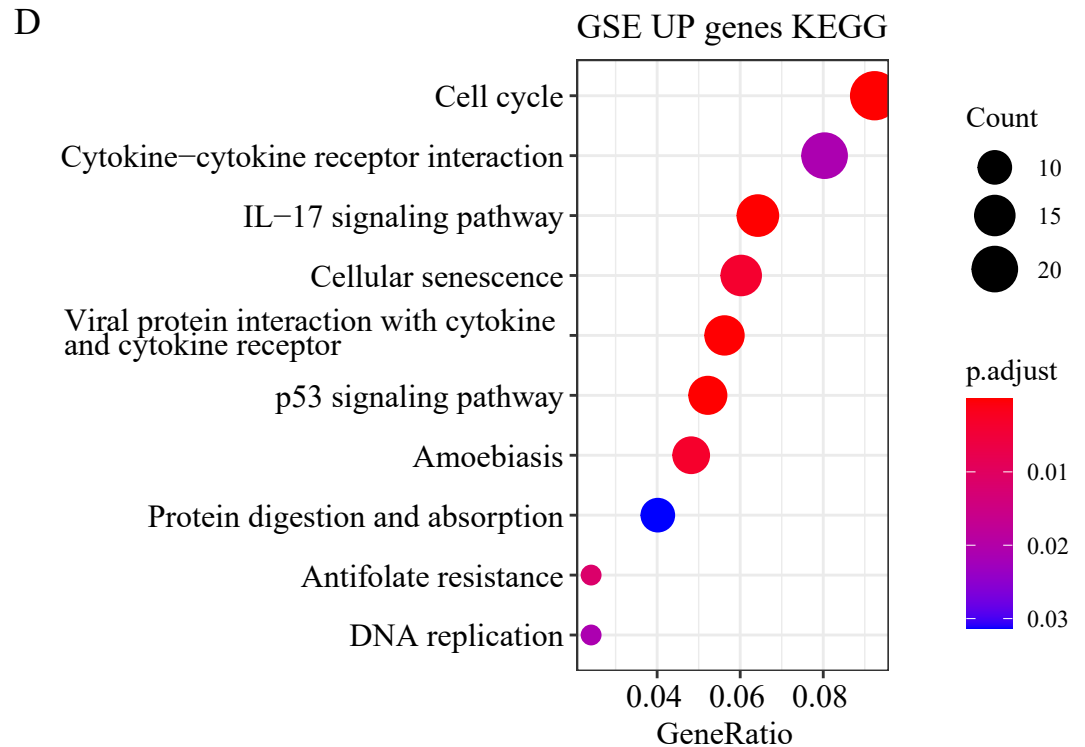

A

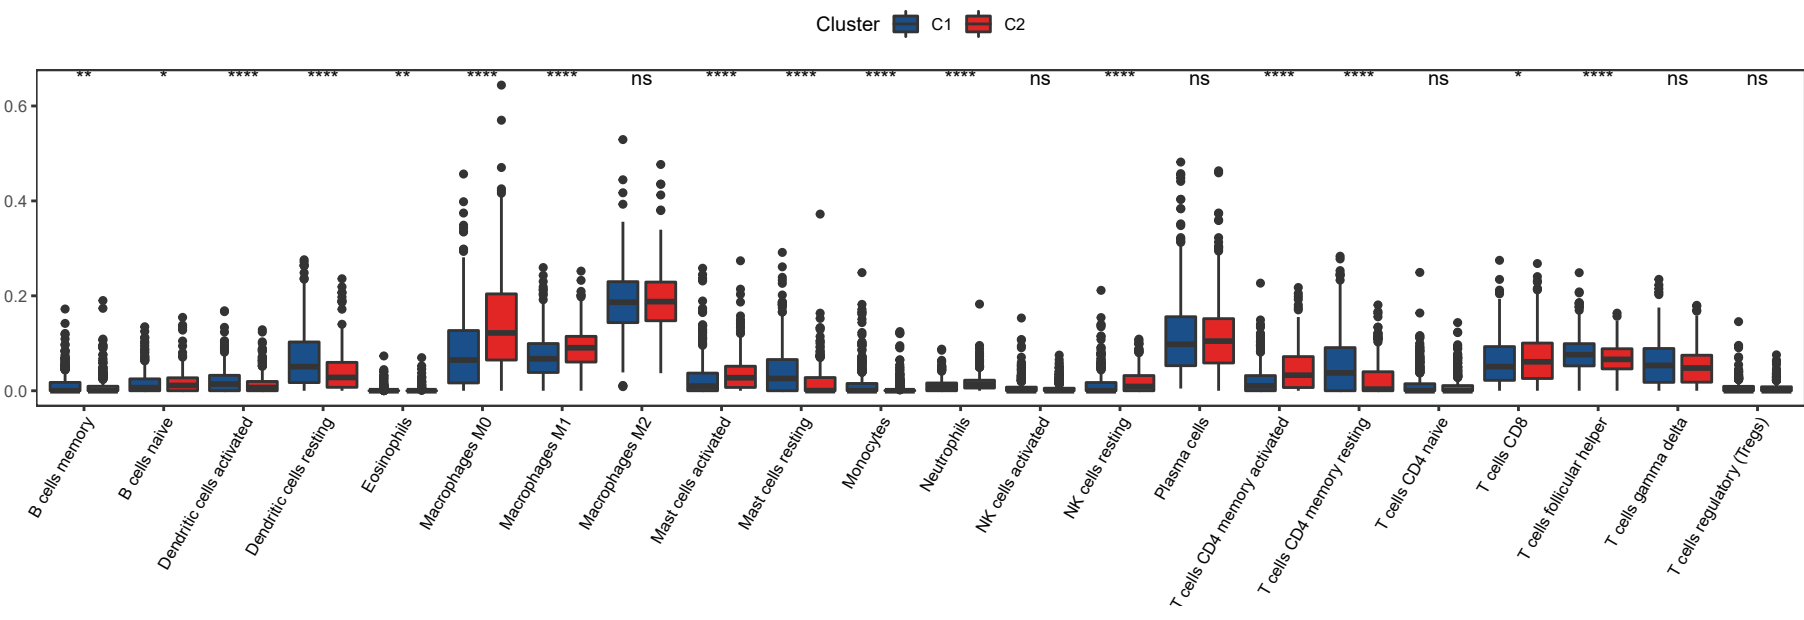

B

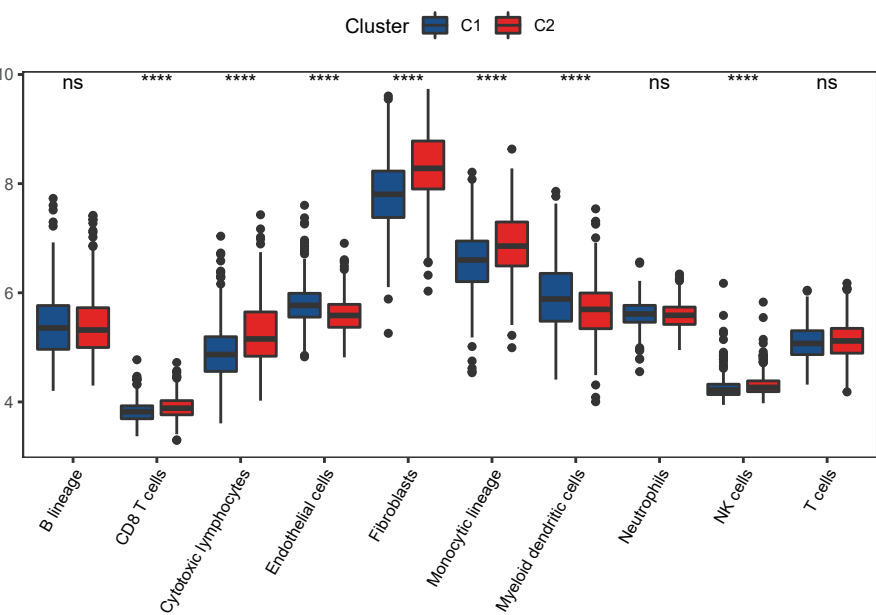

C

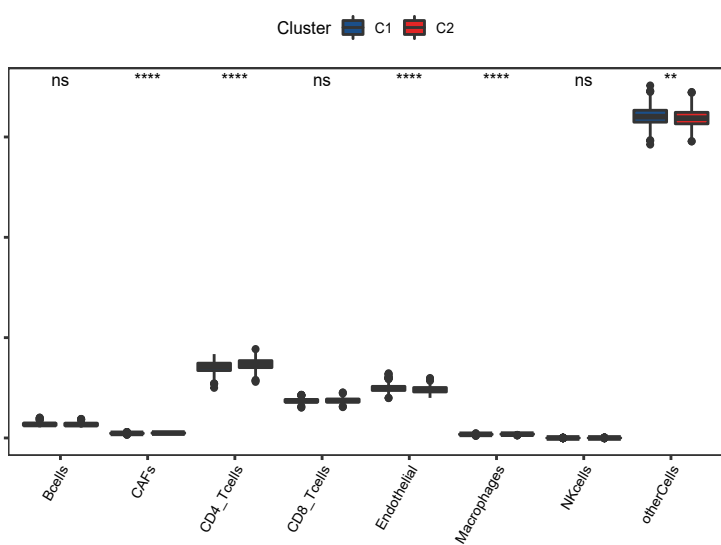

D

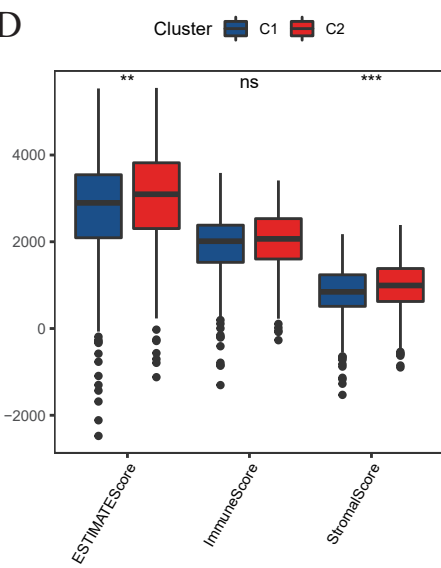

E

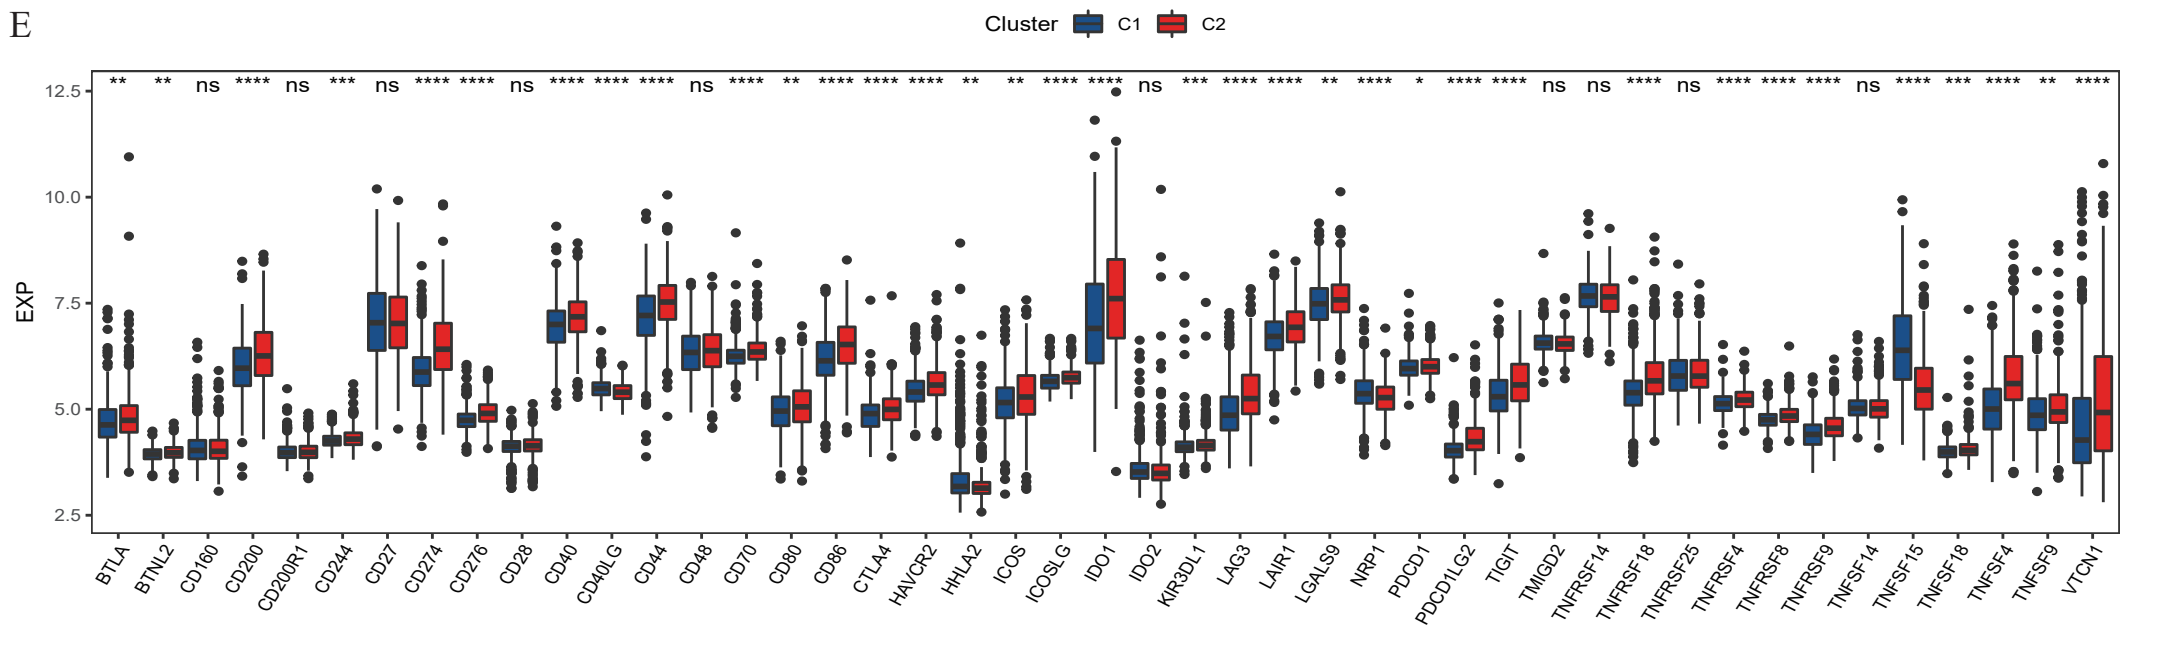

A

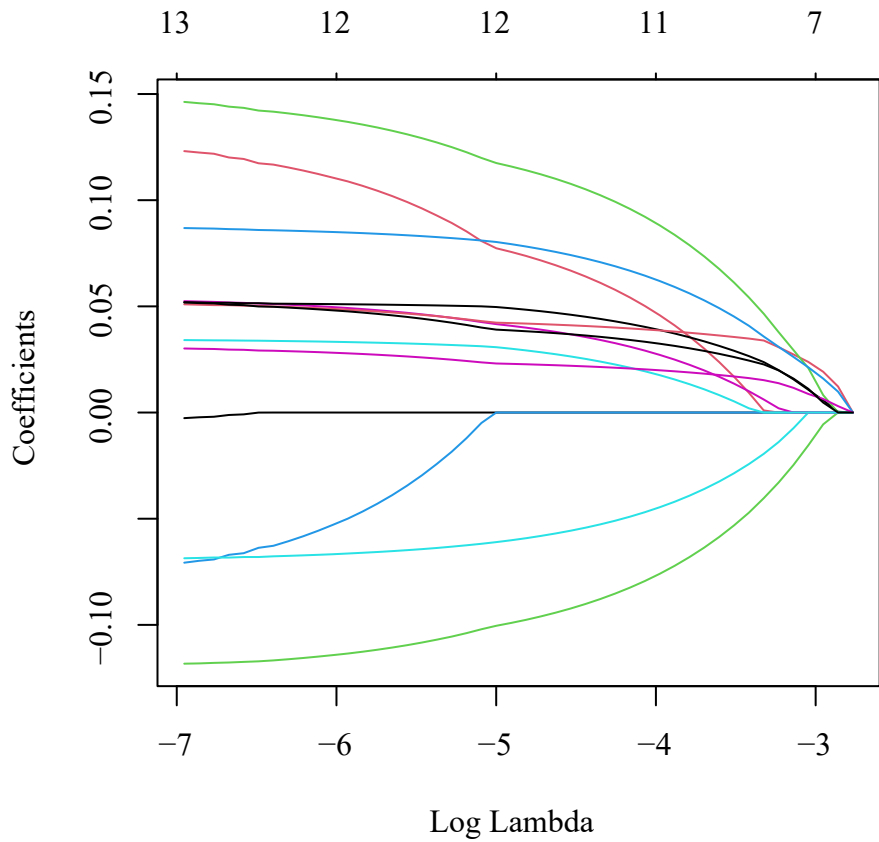

B

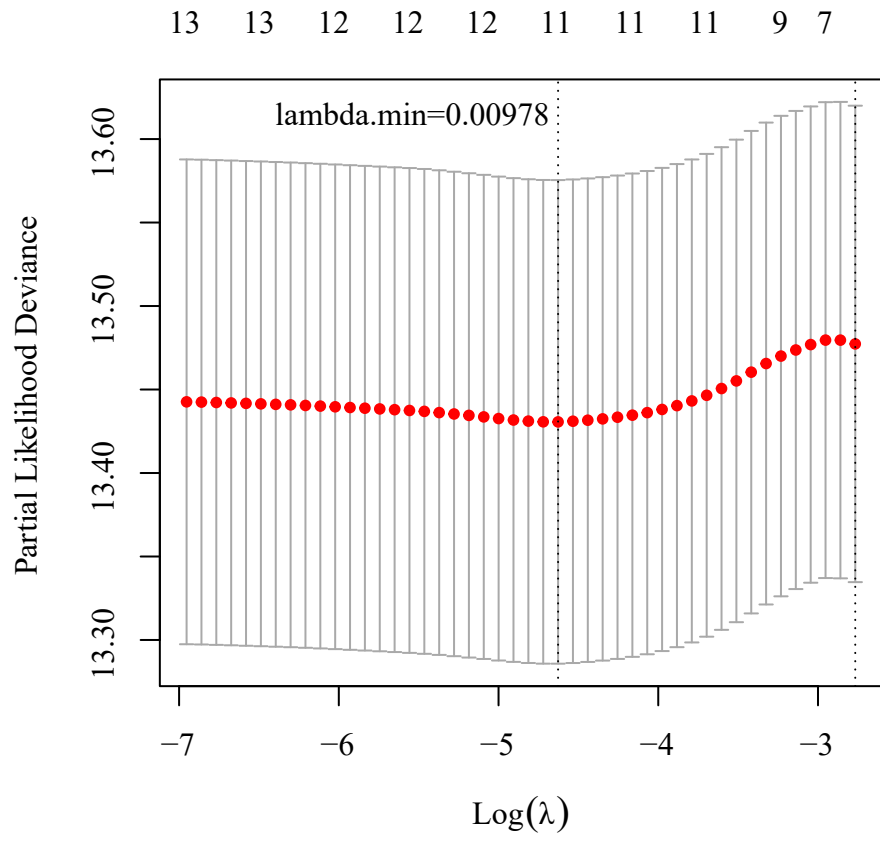

---

## Supplementary figure legends

Supplementary Figure S1. PCA for eliminating batch effects. (A-B) PCA plot before (A) and after (B) removing batch effects in TCGA datasets. (C-D) PCA plot before (C) and after (D) removing batch effects in GSE cohorts.

Supplementary Figure S2. Unsupervised consensus clustering for identifying molecular subtypes. (A) CDF curve of different cluster number  $k = 2$  to 10. (B) Relative change in area under CDF curve when  $k = 2$  to 10. (C) Consensus matrix when  $k = 2$ . (D) The classification of samples when  $k = 2$  to 10.

Supplementary Figure S3. SubMap analysis on C1 and C2 molecular subtypes between TCGA dataset and GSE cohorts.

Supplementary Figure S4. Functional analysis of up-regulated genes in TCGA-NSCLC dataset. (A-C) The top 10 terms of GO annotation including biological process (BP), molecular function (MF) and cellular component (CC). (D) The top 10 enriched KEGG pathways. Dot size represents the gene counts.

Supplementary Figure S5. Functional analysis of up-regulated genes in GSE cohorts. (A-C) The top 10 terms of GO annotation including biological process (BP), molecular function (MF) and cellular component (CC). (D) The top 10 enriched KEGG pathways. Dot size represents the gene counts.

Supplementary Figure S6. Characterization of tumor microenvironment between two subtypes in GSE cohorts. (A) Enrichment of 22 immune cells evaluated by CIBERSORT. (B) Enrichment of 10 immune cells analyzed by MCP-Counter. (C) EPIC measurement for describing 8 immune cells. (D) ESTIMATE method for calculating



---

stromal score and immune score. (E) Expression of 47 immune checkpoints presented as  $\log_2(\text{TPM})$ . Student *t* test was performed. ns, no significance. \* $P < 0.05$ , \*\* $P < 0.01$ , \*\*\* $P < 0.001$ , \*\*\*\* $P < 0.0001$ . TPM, transcript per million.

Supplementary Figure S7. LASSO Cox regression analysis for optimizing the prognostic model. (A) Correlation coefficients of each variable (gene) changing with the increasing lambda value. (B) Confidence interval of the changing lambda value. The first dotted line represents the optimal lambda = 0.00978.
